# Supplementary material for: Determinants of depressive mood in coronary artery disease patients with obstructive sleep apnea and response to continuous positive airway pressure treatment in non‐sleepy and sleepy phenotypes in the RICCADSA cohort
Source: PubMed Central journal article supplement — J Sleep Res. 2019 Jan 9;28(4):e12818. doi: 10.1111/jsr.12818 (PMC6850513; doi:10.1111/jsr.12818), 2019-01-09
Supplement: JSR-28-na-s001.pdf [file JSR-28-na-s001.pdf]

---

## ZUNG SELF-RATING DEPRESSION SCALE

Patient's Initials \_\_\_\_\_

Date of Assessment \_\_\_\_\_

Please read each statement and decide how much of the time the statement describes how you have been feeling during the past several days.

| <b>Make check mark (✓) in appropriate column.</b>         | <b>A little of the time</b> | <b>Some of the time</b> | <b>Good part of the time</b> | <b>Most of the time</b> |
|-----------------------------------------------------------|-----------------------------|-------------------------|------------------------------|-------------------------|
| 1. I feel down-hearted and blue                           |                             |                         |                              |                         |
| 2. Morning is when I feel the best                        |                             |                         |                              |                         |
| 3. I have crying spells or feel like it                   |                             |                         |                              |                         |
| 4. I have trouble sleeping at night                       |                             |                         |                              |                         |
| 5. I eat as much as I used to                             |                             |                         |                              |                         |
| 6. I still enjoy sex                                      |                             |                         |                              |                         |
| 7. I notice that I am losing weight                       |                             |                         |                              |                         |
| 8. I have trouble with constipation                       |                             |                         |                              |                         |
| 9. My heart beats faster than usual                       |                             |                         |                              |                         |
| 10. I get tired for no reason                             |                             |                         |                              |                         |
| 11. My mind is as clear as it used to be                  |                             |                         |                              |                         |
| 12. I find it easy to do the things I used to             |                             |                         |                              |                         |
| 13. I am restless and can't keep still                    |                             |                         |                              |                         |
| 14. I feel hopeful about the future                       |                             |                         |                              |                         |
| 15. I am more irritable than usual                        |                             |                         |                              |                         |
| 16. I find it easy to make decisions                      |                             |                         |                              |                         |
| 17. I feel that I am useful and needed                    |                             |                         |                              |                         |
| 18. My life is pretty full                                |                             |                         |                              |                         |
| 19. I feel that others would be better off if I were dead |                             |                         |                              |                         |
| 20. I still enjoy the things I used to do                 |                             |                         |                              |                         |

Adapted from Zung, A self-rating depression scale, *Arch Gen Psychiatry*, 1965;12:63-70.

---

## KEY TO SCORING THE ZUNG SELF-RATING DEPRESSION SCALE

Consult this key for the value (1-4) that correlates with patients' responses to each statement. Add up the numbers for a total score. Most people with depression score between 50 and 69. The highest possible score is 80<sup>1</sup>.

| Make check mark (✓) in appropriate column.                | A little of the time | Some of the time | Good part of the time | Most of the time |
|-----------------------------------------------------------|----------------------|------------------|-----------------------|------------------|
| 1. I feel down-hearted and blue                           | 1                    | 2                | 3                     | 4                |
| 2. Morning is when I feel the best                        | 4                    | 3                | 2                     | 1                |
| 3. I have crying spells or feel like it                   | 1                    | 2                | 3                     | 4                |
| 4. I have trouble sleeping at night                       | 1                    | 2                | 3                     | 4                |
| 5. I eat as much as I used to                             | 4                    | 3                | 2                     | 1                |
| 6. I still enjoy sex                                      | 4                    | 3                | 2                     | 1                |
| 7. I notice that I am losing weight                       | 1                    | 2                | 3                     | 4                |
| 8. I have trouble with constipation                       | 1                    | 2                | 3                     | 4                |
| 9. My heart beats faster than usual                       | 1                    | 2                | 3                     | 4                |
| 10. I get tired for no reason                             | 1                    | 2                | 3                     | 4                |
| 11. My mind is as clear as it used to be                  | 4                    | 3                | 2                     | 1                |
| 12. I find it easy to do the things I used to             | 4                    | 3                | 2                     | 1                |
| 13. I am restless and can't keep still                    | 1                    | 2                | 3                     | 4                |
| 14. I feel hopeful about the future                       | 4                    | 3                | 2                     | 1                |
| 15. I am more irritable than usual                        | 1                    | 2                | 3                     | 4                |
| 16. I find it easy to make decisions                      | 4                    | 3                | 2                     | 1                |
| 17. I feel that I am useful and needed                    | 4                    | 3                | 2                     | 1                |
| 18. My life is pretty full                                | 4                    | 3                | 2                     | 1                |
| 19. I feel that others would be better off if I were dead | 1                    | 2                | 3                     | 4                |
| 20. I still enjoy the things I used to do                 | 4                    | 3                | 2                     | 1                |

Adapted from Zung.<sup>2</sup>

**References:** 1. Carroll BJ, Fielding JM, Blashki TG. Depression rating scales: a critical review. *Arch Gen Psychiatry.* 1973; 28:361-366.  
2. Zung WWK. A self-rating depression scale. *Arch Gen Psychiatry.* 1965;12:63-70.
