# Supplementary material for: Determinants of depressive mood in coronary artery disease patients with obstructive sleep apnea and response to continuous positive airway pressure treatment in non‐sleepy and sleepy phenotypes in the RICCADSA cohort
Source: PubMed Central journal article supplement — J Sleep Res. 2019 Jan 9;28(4):e12818. doi: 10.1111/jsr.12818 (PMC6850513; doi:10.1111/jsr.12818), 2019-01-09
Supplement: JSR-28-na-s002.pdf [file JSR-28-na-s002.pdf]

Supplemental Table 2: Distribution (percentages) of Zung Self-rating Depression Scale items generating the highest raw score (4) at baseline among the CAD patients with OSA *vs* no-OSA

|    |                                                                          | OSA<br>n=386 | No-OSA<br>n=107 |
|----|--------------------------------------------------------------------------|--------------|-----------------|
| 1  | I feel down-hearted and blue (most of the time)                          | 0.8          | 1.9             |
| 2  | Morning is when I feel the best (a little of the time)                   | 17.6         | 13.1            |
| 3  | I have crying spells or feel like it (most of the time)                  | 1.0          | 0.9             |
| 4  | I have trouble sleeping at night (most of the time)                      | 4.9          | 0.9             |
| 5  | I eat as much as I used to (a little of the time)                        | 13.2         | 8.4             |
| 6  | I still enjoy sex (a little of the time)                                 | 26.2         | 17.8            |
| 7  | I notice that I am losing weight (most of the time)                      | 6.7          | 4.7             |
| 8  | I have trouble with constipation (most of the time)                      | 0.8          | 3.7             |
| 9  | My heart beats faster than usual (most of the time)                      | 0.8          | 0.9             |
| 10 | I get tired for no reason (most of the time)                             | 2.6          | 3.7             |
| 11 | My mind is as clear as it used to be (a little of the time)              | 9.1          | 9.3             |
| 12 | I find it easy to do the things I used to (a little of the time)         | 9.6          | 12.1            |
| 13 | I am restless and can't keep still (most of the time)                    | 0.8          | 0.9             |
| 14 | I feel hopeful about the future (a little of the time)                   | 5.4          | 5.6             |
| 15 | I am more irritable than usual (most of the time)                        | 2.6          | 2.8             |
| 16 | I find it easy to make decisions (a little of the time)                  | 4.4          | 3.7             |
| 17 | I feel that I am useful and needed (a little of the time)                | 5.7          | 5.6             |
| 18 | My life is pretty full (a little of the time)                            | 1.3          | 1.9             |
| 19 | I feel that others would be better off if I were dead (most of the time) | 1.6          | 0.0             |
| 20 | I still enjoy the things I used to do (a little of the time)             | 4.4          | 3.7             |

*Abbreviations:* CAD, coronary artery disease; OSA, obstructive sleep apnea.
